# Supplementary material for: Adjunctive Treatment with Rhodiola Crenulata in Patients with Chronic Obstructive Pulmonary Disease – A Randomized Placebo Controlled Double Blind Clinical Trial
Source: PubMed Central journal article supplement (PMC4476627; doi:10.1371/journal.pone.0128142), 2015-06-22
Supplement: pone.0128142.s003.pdf [file pone.0128142.s003.pdf]

6 August 2014

Cranmer Terrace  
London SW17 0RE  
Switchboard  
+44 (0)20 8672 9944  
[www.sgul.ac.uk](http://www.sgul.ac.uk)

**To Whom It May Concern:**

This is to confirm that St George's, University of London (St George's Hospital Medical School) has given permission for Ming-Lung Chuang, Chung Shan Medical University Hospital, Taichung, Taiwan to use the St George's Respiratory Questionnaire (SGRQ) in a research study entitled "Adjunctive Treatment with Rhodiola Crenulata in Patients with Chronic Obstructive Pulmonary Disease".



**Professor Paul Jones, PhD FRCP**  
**Professor of Respiratory Medicine**
